# Supplementary material for: Sympathetic axonal sprouting induces changes in macrophage populations and protects against pancreatic cancer
Source: PubMed Central journal article supplement (PMC9007988; doi:10.1038/s41467-022-29659-w), 2022-04-13
Supplement: 41467_2022_29659_MOESM1_ESM.pdf [file 41467_2022_29659_MOESM1_ESM.pdf]

## **Supplementary Information**

### **Sympathetic axonal sprouting induces changes in macrophage populations and protects against pancreatic cancer**

Jérémy Guillot<sup>1\*</sup>, Chloé Dominici<sup>1\*</sup>, Adrien Lucchesi<sup>1\*</sup>, Huyen Thi Trang Nguyen<sup>1,2\*</sup>, Angélique Puget<sup>1</sup>, Mélanie Hocine<sup>1</sup>, Martha M. Rangel-Sosa<sup>1</sup>, Milesa Simic<sup>3</sup>, Jérémy Nigri<sup>4</sup>, Fabienne Guillaumond<sup>4</sup>, Martin Bigonnet<sup>4</sup>, Nelson Dusetti<sup>4</sup>, Jimmy Perrot<sup>5</sup>, Jonathan Lopez<sup>6,7,8</sup>, Anders Etzerodt<sup>3,9</sup>, Toby Lawrence<sup>3</sup>, Pierre Pudlo<sup>10</sup>, Florence Hubert<sup>10</sup>, Jean-Yves Scoazec<sup>11</sup>, Serge A. van de Pavert<sup>3</sup>, Richard Tomasini<sup>4</sup>, Sophie Chauvet<sup>1#</sup> and Fanny Mann<sup>1#</sup>.

**Supplementary Figures and Figure Legends 1-10**

**Supplementary Tables 1 and 2**

**Supplementary Reference**

Supplementary Figures

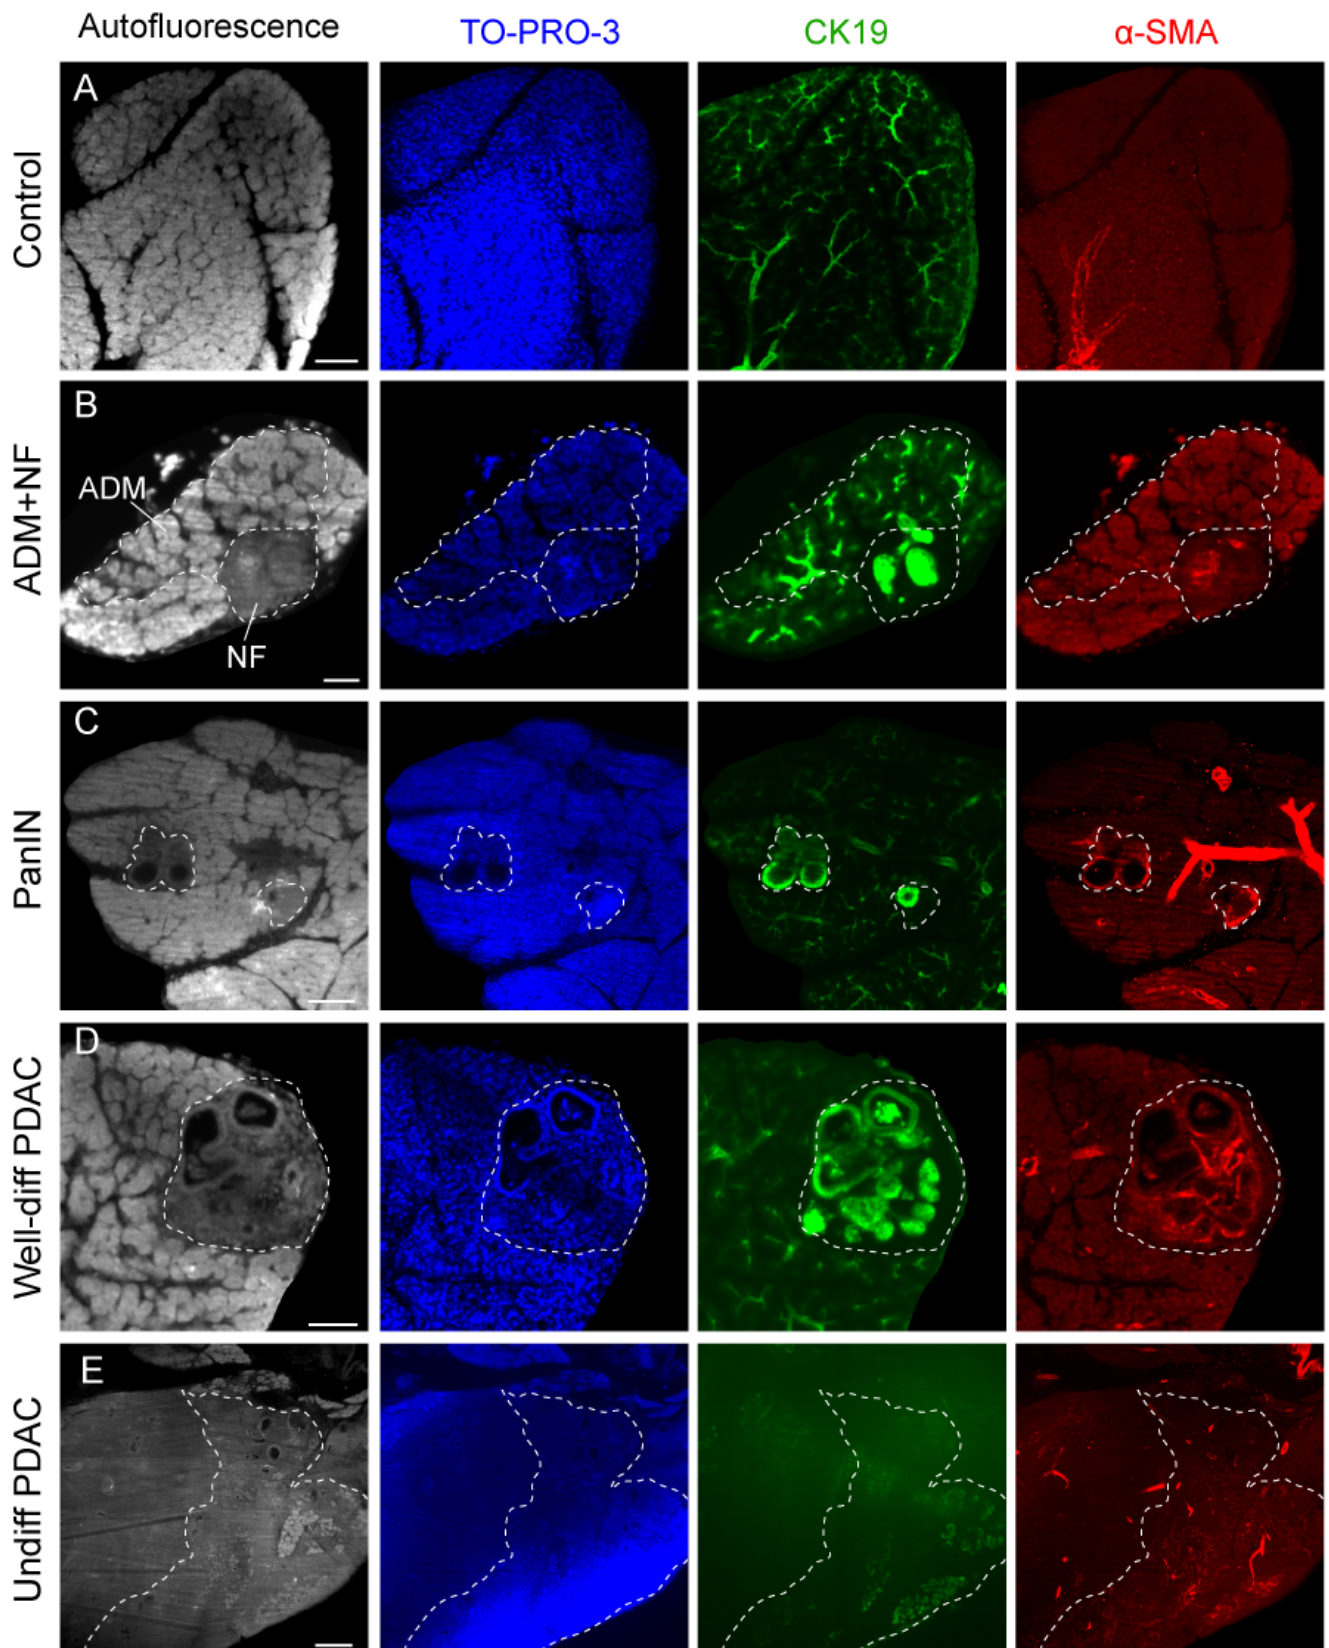

**Supplementary Figure 1. Identification of regions of interest (ROI) using tissue autofluorescence.**

**A–E**, Optical sections through cleared pancreata of 8-week-old control (**A**) and KIC (**B–E**) mice. Images are representative of 7 mice analyzed per genotype. From left to right, panels show the acquisition of tissue autofluorescence (imaged in the blue-green spectrum with 480 nm laser excitation), nuclear counterstaining with TO-PRO-3, and immunofluorescent signals of anti-CK19 and anti- $\alpha$ -SMA antibodies. Images show normal acinar tissue (**A**), ADM and NF (**B**), PanIN lesions (**C**), well-differentiated PDAC (**D**), and undifferentiated/anaplastic PDAC regions (**E**). ROI are delimited by a white dashed line. In control pancreas, CK19 is expressed by epithelial cells of pancreatic ducts and  $\alpha$ -SMA is expressed by smooth muscle cells in vessel walls. In pretumor and tumor lesions, CK19 is expressed by cancer cells and  $\alpha$ -SMA is expressed by cancer-associated fibroblasts (CAFs). Tissue autofluorescence provides sufficient histological information to identify the different stages of disease progression. The identity of the pancreatic lesions shown above has been confirmed by an anatomopathologist. Scale bars = 50  $\mu$ m (**A**, **B**), 150  $\mu$ m (**C**), 100  $\mu$ m (**D**), and 300  $\mu$ m (**E**).

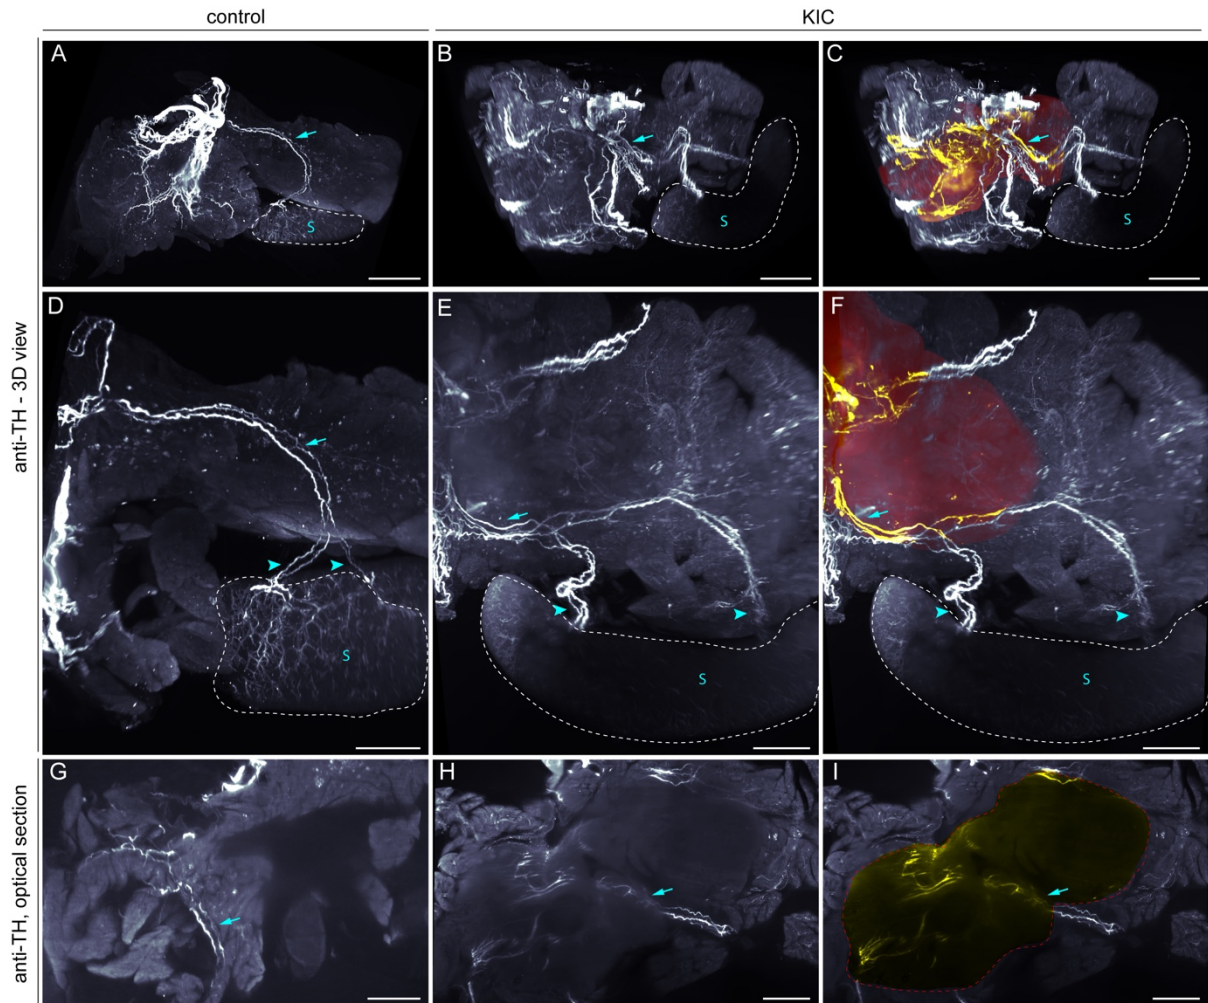

**Supplementary Figure 2. 3D patterns of sympathetic nerve fiber bundles in control and KIC pancreata.** Representative 3D views (A–F) and optical sections (G–I) of anti-TH labeled pancreas and spleen (s, delimited with dotted line) of 8-week-old control (A, D, and G) and KIC (B, C, E, F, H, and I) mice. All panels are LSFM images of solvent-cleared tissues and are representative of 4 mice analyzed for each genotype. The blue arrow points to the splenic nerve, whose branches (arrowheads) project to the spleen. C, F, I, 3D segmentation of pancreatic tumor (red), intra-tumoral TH<sup>+</sup> nerve fibers (yellow), and extra-tumoral TH<sup>+</sup> nerve fibers (white). Scale bars = 2 mm (A), 3 mm (B, C), and 1 mm (D–I).

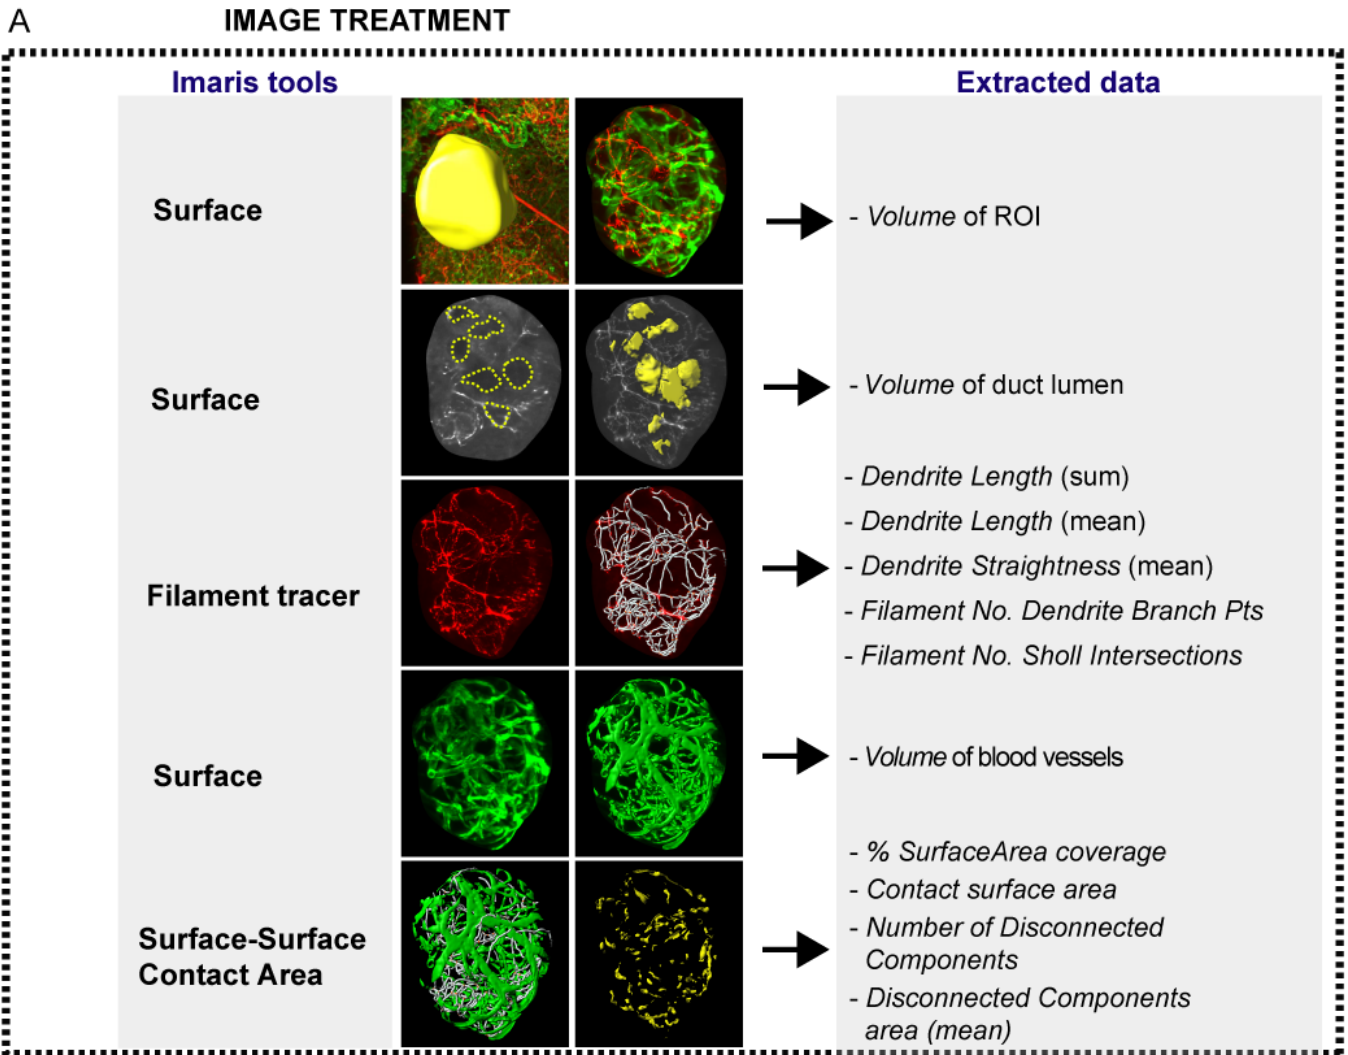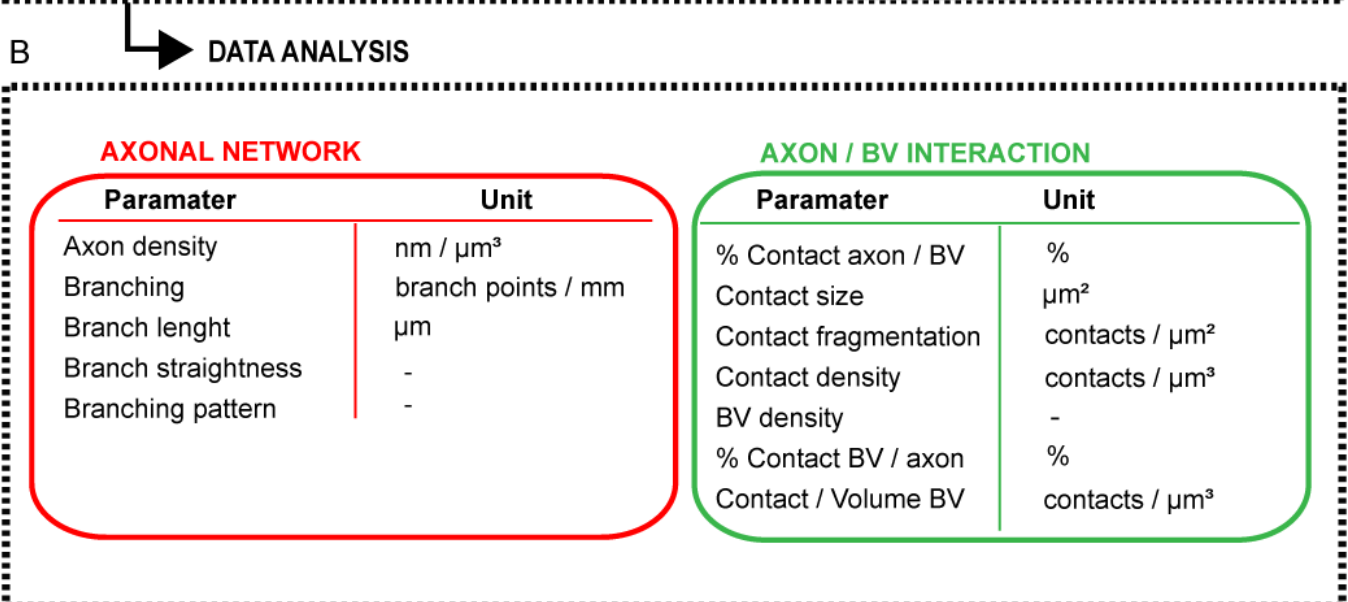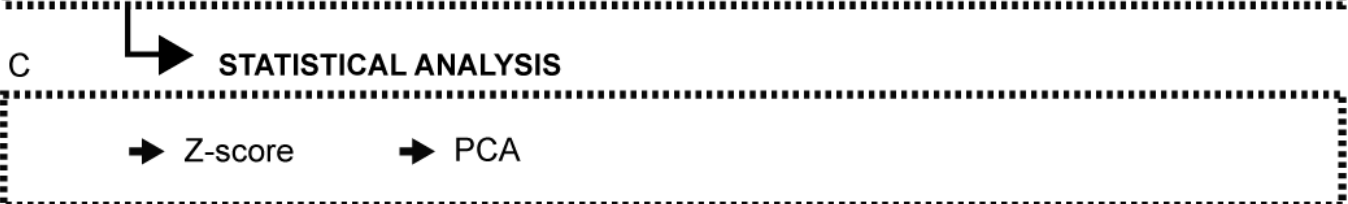

**Supplementary Figure 3. Image processing and quantitative analysis of local remodeling of sympathetic axons.** **A**, LSM images were processed with Imaris software. ROI were identified via tissue autofluorescence (imaged at 488 nm excitation). A mask was created around each ROI using the “Surface” tool, after which the ROI volume was collected in the statistics tab. In non-invasive pancreatic lesions and PDAC, masks were created around the lumen of epithelial lesions using the “Surface” tool and the volume of the lumen (empty space) was collected and deduced from the ROI volume (see also Supplementary Fig. 4). Axonal networks were reconstructed manually using “Filament tracer.” The following parameters were collected in the statistics tab: dendrite length (sum and mean values), defined as the length of each axon branch; dendrite straightness (mean value), defined as the ratio between branch length and radial distance between two branch points; filament no. Sholl intersections, defined as the number of branch intersections per concentric spheres originating at the centroid of the ROI; and filament no. dendrite branch pts, defined as the number of branching points in the entire axon network. The “Surface” tool was used to reconstruct vascular networks and collect the volume occupied by the blood vessels. Finally, the MATLAB plug-in Imaris XTension “Surface-Surface contact area” was used to generate the contact surface areas between axonal and blood vessels networks. In the statistic tab, we collected the number of disconnected components, defined as the number of contacts between the two surfaces; the disconnected components area (mean value), defined as the area of each contact region; and the contact surface area; defined as the total surface of contacts. We then collected the % Surface Area coverage, defined as the percentage of axon surface in contact with blood vessels (% contact axon/BV) or as the percentage of blood vessel surface in contact with axons (% contact BV/axon). **B**, the extracted data were used to calculate 12 parameters describing the morphology of axonal networks and interactions between axons and blood vessels (BV). Details of the calculations are provided in Supplementary Table 1. Statistical analysis was performed using MATLAB and R software (**C**).

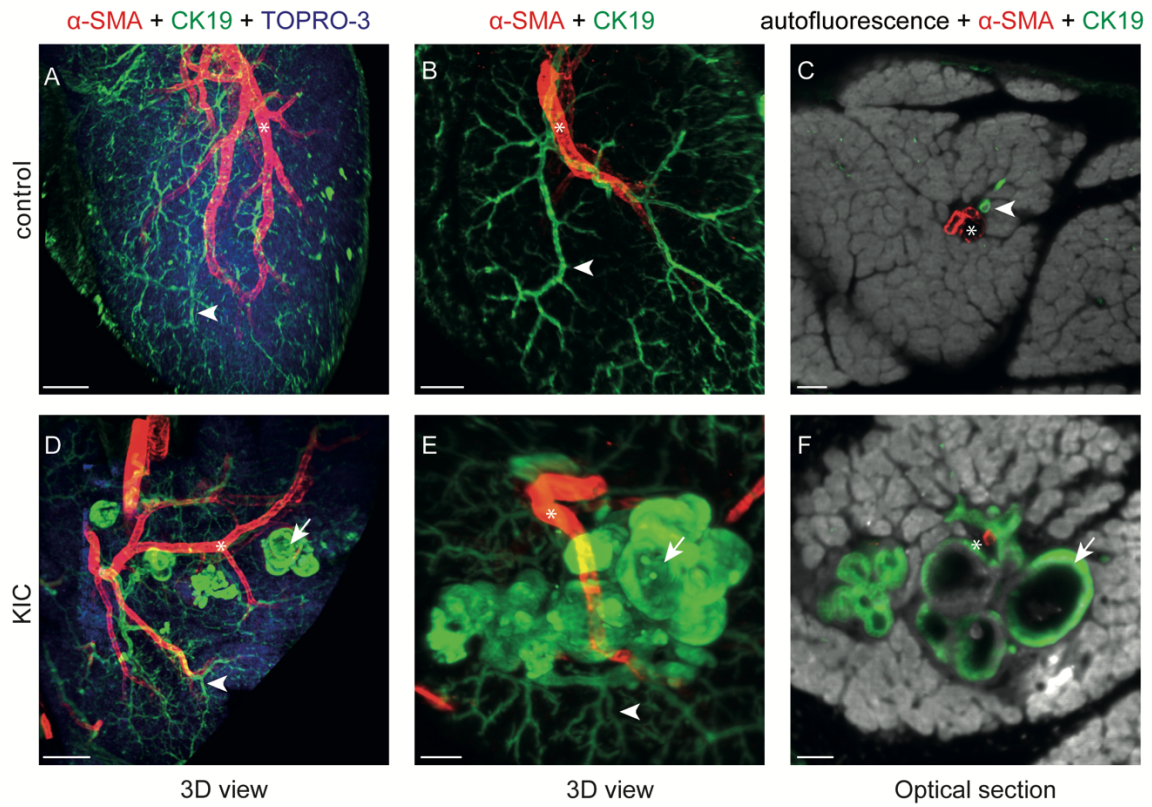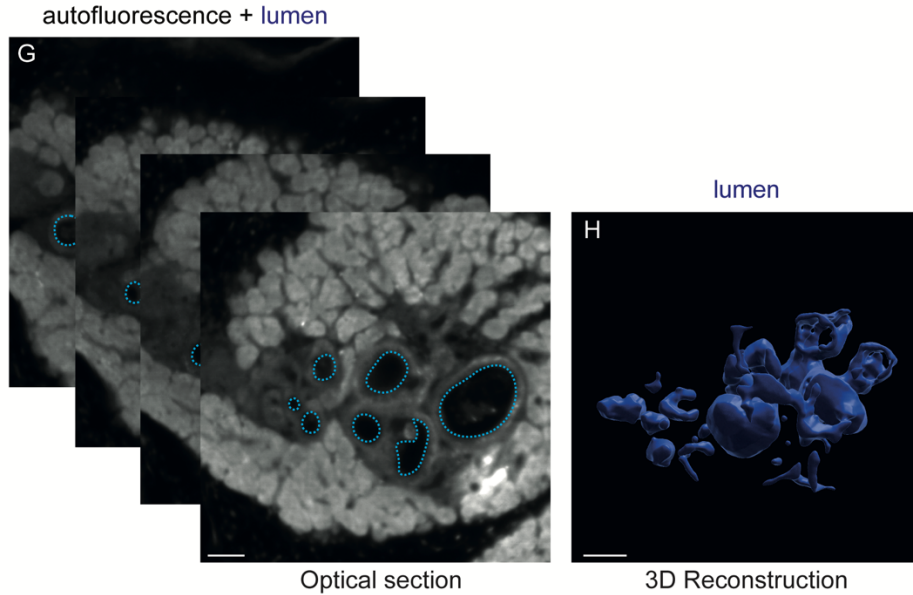

**Supplementary Figure 4. 3D visualization of pancreatic epithelial lesions and lumen reconstruction.**

Maximal intensity projection of 3D volume (A-B, D-E) and optical sections (C and F) of anti- $\alpha$ -SMA and anti-CK19 labeled pancreatic lobules of 8-week-old control (A-C) and KIC (D-F) mice. Asterisks indicate

blood vessels; arrowheads indicate pancreatic ducts and arrows point to epithelial lesions. All panels are LSFM images of solvent-cleared tissues and are representative of 7 mice analyzed for each genotype. **G** and **H**, the lumen of the epithelial lesions present in KIC pancreas were segmented on optical sections images of tissue autofluorescence (imaged at 488 nm excitation) or CK19 staining (**G**) and their volume reconstructed (**H**). Scale bars = 100  $\mu\text{m}$  (**A**, **D**), 50  $\mu\text{m}$  (**B**), 25  $\mu\text{m}$  (**C**, **E**, **F**, **G**), and 20  $\mu\text{m}$  (**H**).



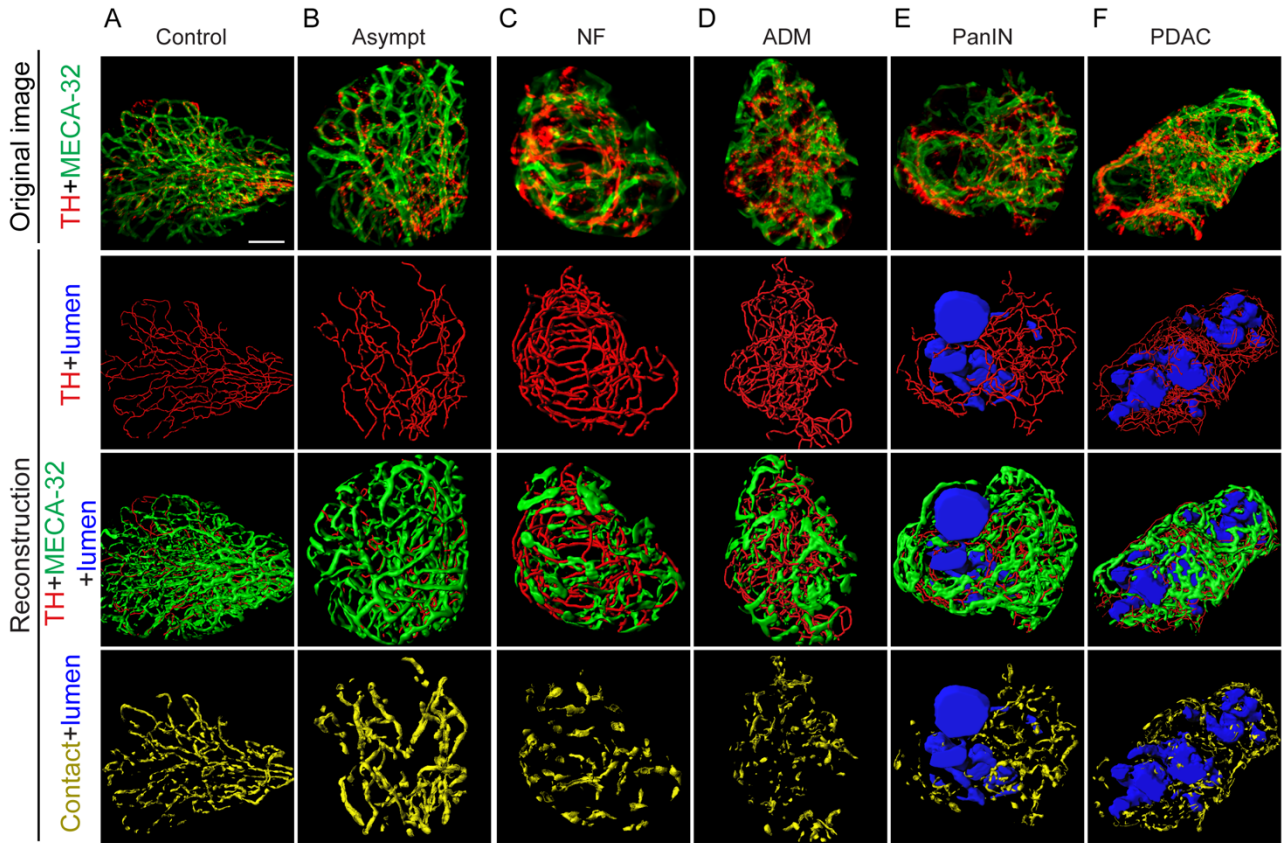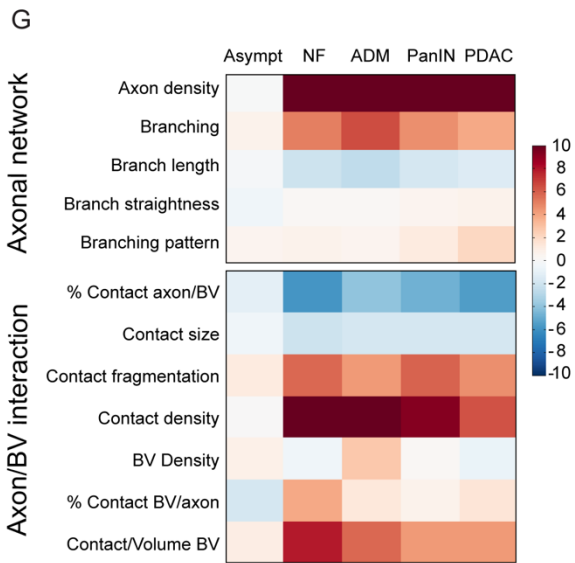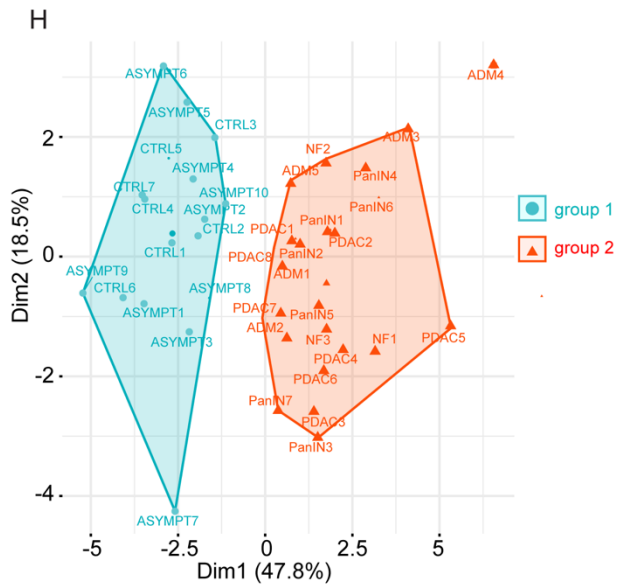

**Supplementary Figure 5. 3D visualization and statistical analysis of sympathetic axon and blood vessel networks in KPC pancreas.**

**A–F**, Representative images of 14-week-old control (**A**) or KPC (**B–F**) pancreata immunostained with anti-TH and MECA-32 antibodies (first row). 3D reconstructions of sympathetic axons (red, second row), blood vessels (green, third row), and axon/vessel surface contacts (yellow, fourth row) in normal acinar tissue (**A**), asymptomatic acinar tissue (**B**), NF (**C**), ADM (**D**), PanIN (**E**), and a well-differentiated PDAC region (**F**). Lumen of the epithelial lesions are represented in blue. Images are representative of 3 control and 4 KPC mice analyzed. **G**, Heatmap of the Z-scores calculated for each of the 12 variables describing the architecture of sympathetic axons and their relationship with blood vessels. Values in 10 asymptomatic acinar regions (Asymp), 3 NF, 5 ADM, 7 PanIN, and 8 PDAC samples of 14-week-old KPC mice (n = 4) were compared with those of 7 normal acinar regions in age-matched control mice (n = 3). **H**, Factor map of the PCA performed on 40 tissue samples and 12 variables describing sympathetic innervation. Two cluster groups were identified corresponding to control and asymptomatic tissues (group 1, blue) and pre-tumor and tumor lesions (group 2, red). Scale bars = 25  $\mu\text{m}$  (**C**), 50  $\mu\text{m}$  (**A**, **B** and **D–F**). Source data are provided as a Source Data file.

## KIC

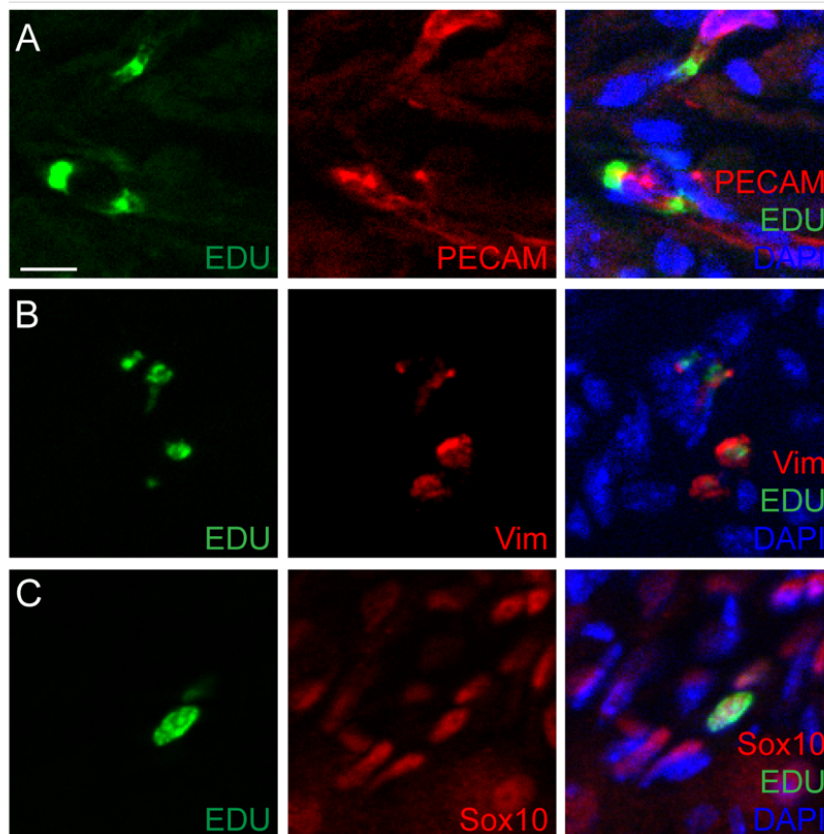

### Supplementary Figure 6. Identity of EdU<sup>+</sup> cells in the coeliac-superior mesenteric ganglia of KIC mice

A–C, representative images of EDU<sup>+</sup> cells in the coeliac-superior mesenteric complex of 5.5 -week-old KIC mice, immunostained with anti-PECAM (endothelial cell marker, **A**), anti-Vimentin (fibroblasts marker, **B**) and anti-Sox10 (glial cells marker, **C**). Images are representative of 3 mice analyzed.

Scale bars= 20  $\mu$ m

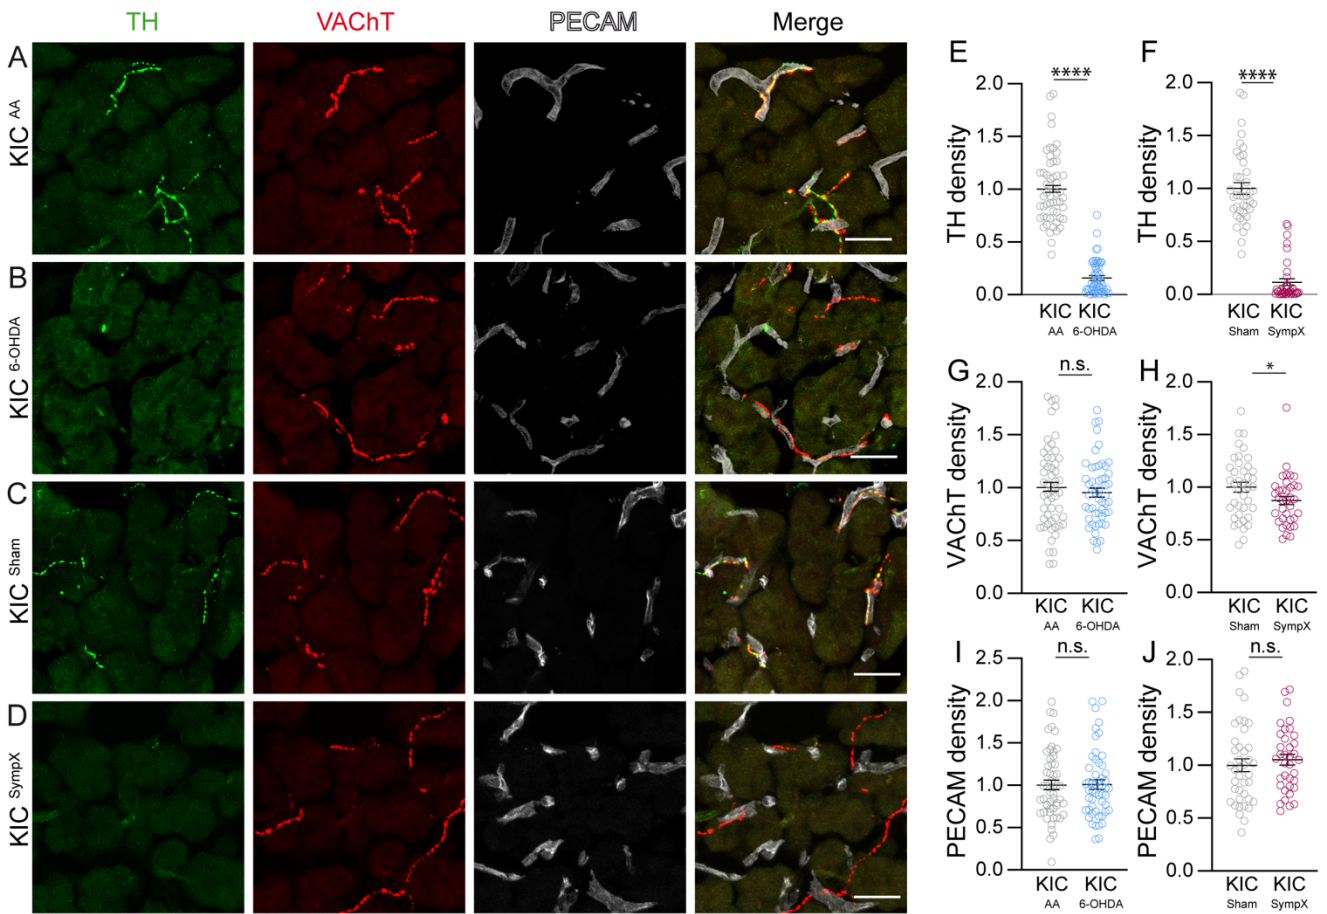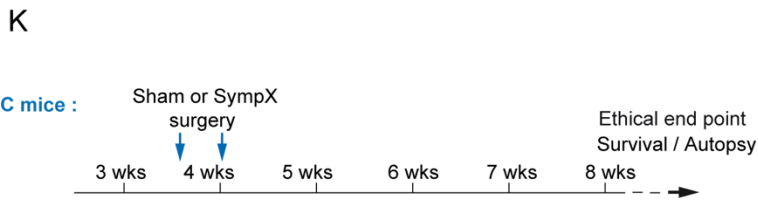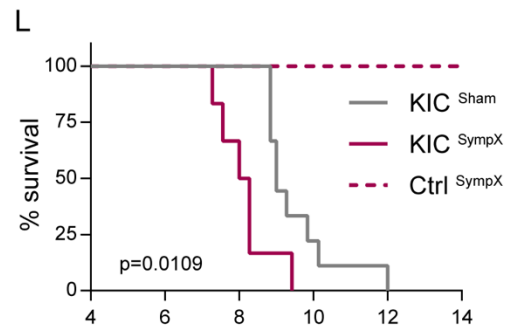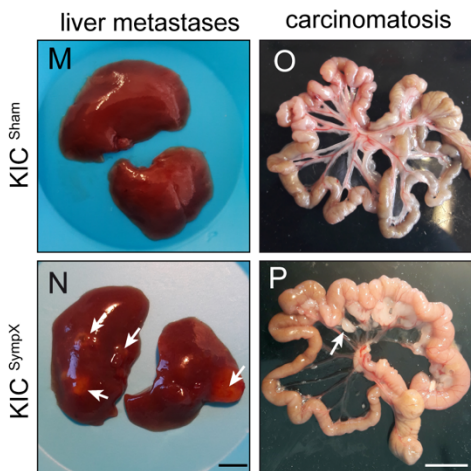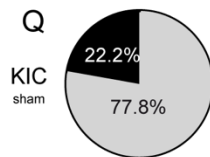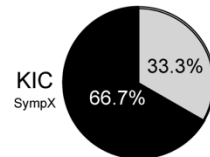

■ mice with liver metastases  
 □ mice without liver metastases

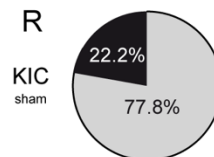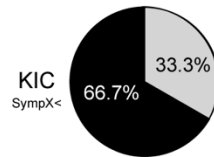

■ mice with carcinomatosis  
 □ mice without carcinomatosis

**Supplementary Figure 7. Effects of sympathectomy on tumor growth, metastatic spread, and survival.**

**A–D**, Representative images of pancreatic acinar tissue immunostained with anti-TH, anti-VACHT, and anti-PECAM antibodies. The pancreas was collected from mice treated with AA (**A**) or 6-OHDA (**B**) or from mice that had undergone sham surgery (Sham; **C**) or surgical sympatectomy (SympX; **D**) two weeks after chemical or surgical sympathectomy. **E–J**, Histograms representing the density of TH<sup>+</sup> fibers (**E**, **F**), VACHT<sup>+</sup> fibers (**G**, **H**), and PECAM<sup>+</sup> vessels (**I**, **J**) in the pancreas of sympathectomized mice shown in (**A–D**). Data are presented as mean ± SEM;  $p < 0.0001$  (**E**, **F**),  $p = 0.5$  (**G**) and  $p = 0.0423$  (**H**) with Mann–Whitney test;  $p = 0.96$  (**I**) and  $p = 0.52$  (**J**) with unpaired t-test. KIC<sup>AA</sup>,  $n = 2$  mice, 54 images; KIC<sup>6-OHDA</sup>,  $n = 2$  mice, 52 images; KIC<sup>Sham</sup>,  $n = 2$  mice, 40 images; KIC<sup>SympX</sup>,  $n = 2$ , 36 images. **K**, Outline of the in vivo experiments. **L**, Kaplan–Meier curve comparing overall survival of KIC mice with intact pancreas (KIC<sup>Sham</sup>,  $n = 9$ ) or with surgical sympathectomy (KIC<sup>SympX</sup>,  $n = 6$ ) and control sympathectomized mice (Ctrl<sup>SympX</sup>,  $n = 5$ ). KIC<sup>Sham</sup> vs KIC<sup>SympX</sup>,  $p = 0.0109$  (Log-rank test) and hazard ratio B/A = 3.179 (A = KIC<sup>Sham</sup> and B = KIC<sup>SympX</sup>). **M–P**, Representative pictures of livers and intestine of KIC<sup>Sham</sup> and KIC<sup>SympX</sup> mice collected at autopsy. **Q–R**, Pie charts showing the percentage of KIC<sup>Sham</sup> ( $n = 6$ ) and KIC<sup>SympX</sup> ( $n = 9$ ) mice with or without liver metastasis (**Q**) or carcinomatosis in the intestine mesentery (**R**) at death. Scale bars = 50 μm (**A–D**), 5 mm (**M**, **N**). Source data are provided as a Source Data file.

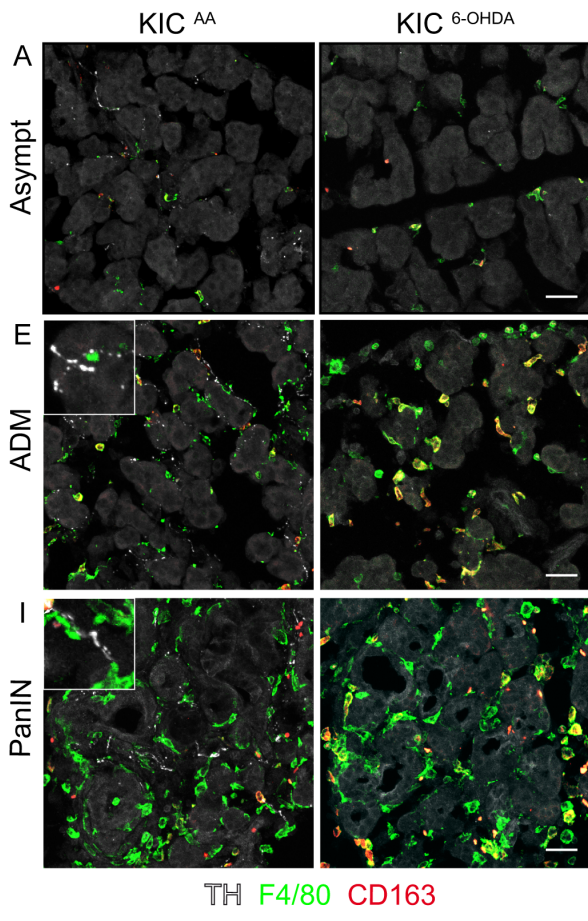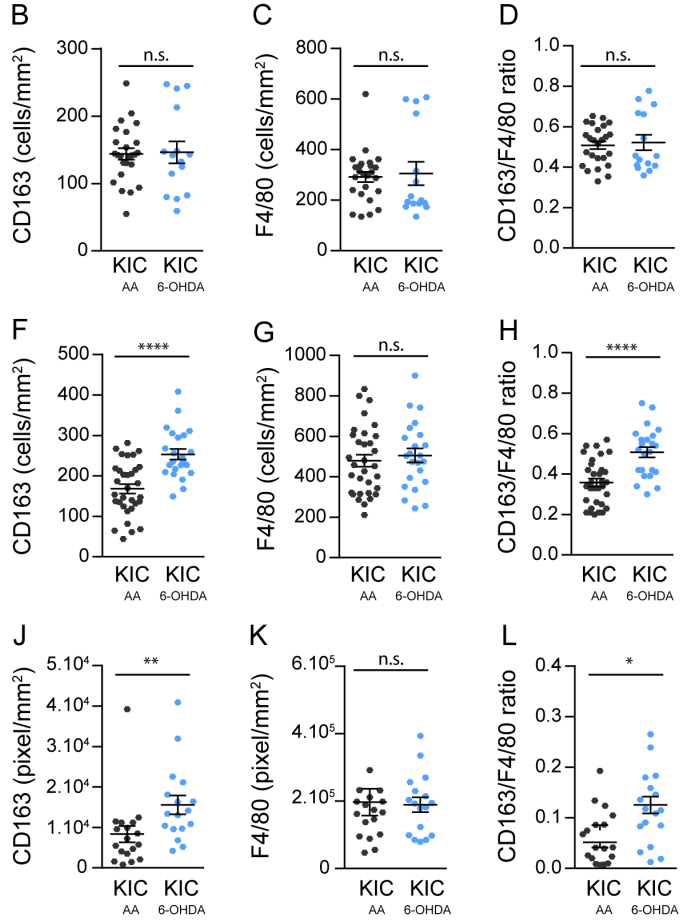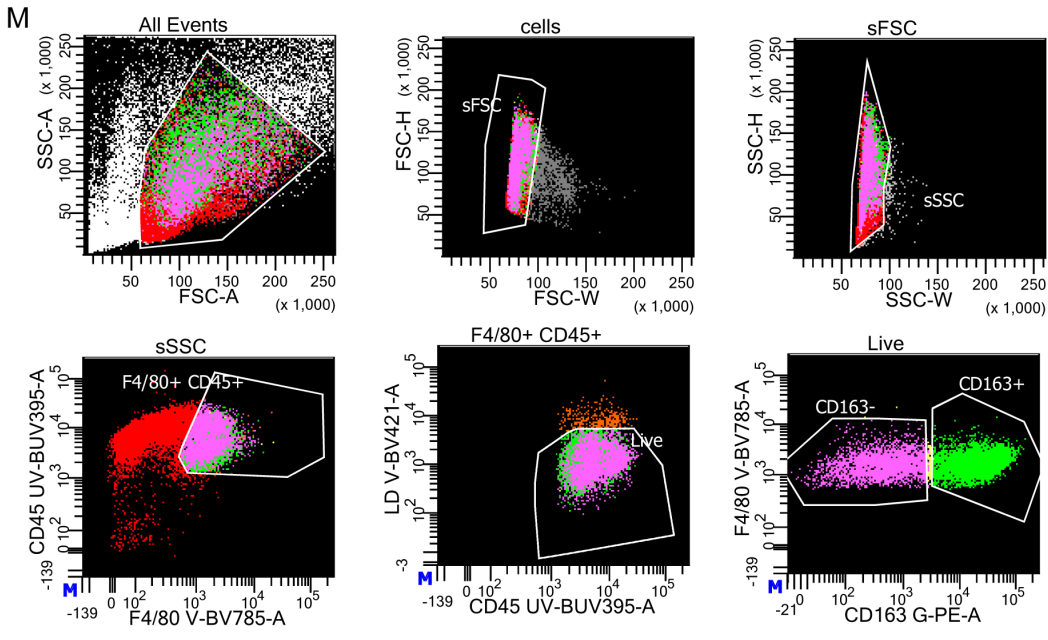

**N**

| Tube: Pancreas |         |         |        |
|----------------|---------|---------|--------|
| Population     | #Events | %Parent | %Total |
| All Events     | 50,000  | ####    | 100.0  |
| cells          | 30,543  | 61.1    | 61.1   |
| sFSC           | 29,462  | 96.5    | 58.9   |
| sSSC           | 29,244  | 99.3    | 58.5   |
| F4/80+ CD45+   | 8,173   | 27.9    | 16.3   |
| Live           | 7,816   | 95.6    | 15.6   |
| CD163+         | 4,677   | 59.8    | 9.4    |
| CD163-         | 3,009   | 38.5    | 6.0    |

**Supplementary Figure 8. Distribution and FACS sorting of CD163+ pancreatic macrophages.**

**A**, Immunostaining for F4/80, CD163, and TH in asymptomatic acinar tissue (Asympt) of 6.5-week-old KIC mice treated with AA or 6-OHDA. **B–D**, Scattered dot plots depicting the density of CD163+ macrophages (**B**;  $p = 0.7720$ , Mann–Whitney test), F4/80+ macrophages (**C**;  $p = 0.3411$ , Mann–Whitney test), and CD163/F4/80 ratio (**D**;  $p = 0.9956$ , Mann–Whitney test) in asymptomatic regions of AA and 6-OHDA-treated KIC mice. KIC<sup>AA</sup>,  $n = 4$  mice, 25 images; KIC<sup>6-OHDA</sup>,  $n = 3$  mice, 15 images. **E**, Immunostaining for F4/80, CD163, and TH in ADM of 6.5-week-old KIC mice treated with AA or 6-OHDA. **F–H**, Scattered dot plots depicting the density of CD163+ macrophages (**F**;  $p < 0.0001$ , unpaired  $t$ -test), F4/80+ macrophages (**G**;  $p = 0.5667$ , unpaired  $t$ -test), and CD163/F4/80 ratio (**H**;  $p < 0.0001$ , Mann–Whitney test) in the ADM of AA- and 6-OHDA-treated KIC mice. KIC<sup>AA</sup>,  $n = 6$  mice, 33 images; KIC<sup>6-OHDA</sup>,  $n = 4$  mice, 23 images. **I**, Immunostaining for F4/80, CD163, and TH in PanIN lesions of 6.5-week-old KIC mice treated with AA or 6-OHDA. **J–L**, Scattered dot plots depicting the density of CD163+ macrophages (**J**;  $p < 0.0001$ , Mann–Whitney test), F4/80+ macrophages (**K**;  $p = 0.0024$ ; Mann–Whitney test), and CD163/F4/80 ratio (**L**;  $p = 0.0153$ , Mann–Whitney test) in PanIN of AA- and 6-OHDA-treated KIC mice. KIC<sup>AA</sup>,  $n = 4$  mice, 18 images; KIC<sup>6-OHDA</sup>,  $n = 4$  mice, 17 images. Data are presented as median  $\pm$  SEM. **M**, Representative FACS gating strategy for the isolation of CD163+ macrophages from mouse pancreas. Briefly, cells were gated according to size and granularity, with doublets subsequently removed. Macrophages were gated as CD45+/F4/80+ cells and live cells were gated inside this population. Finally, CD163+ cells were selected for use in experiments shown in Fig. 10H. **N**, Gating hierarchy of a representative sample. Scale bars= 50  $\mu$ m. Source data are provided as a Source Data file.

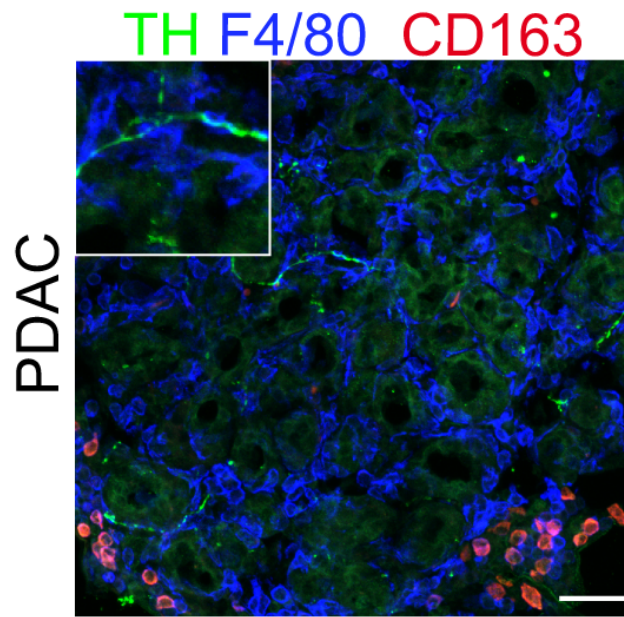

**Supplementary Figure 9. Proximity between macrophages and the sympathetic innervation of PDAC tissues.**

Immunostaining for F4/80, CD163, and TH in PDAC tissue of a 6.5-week-old KIC mouse. Images are representative of 4 mice analyzed. Scale bar = 50  $\mu$ m.



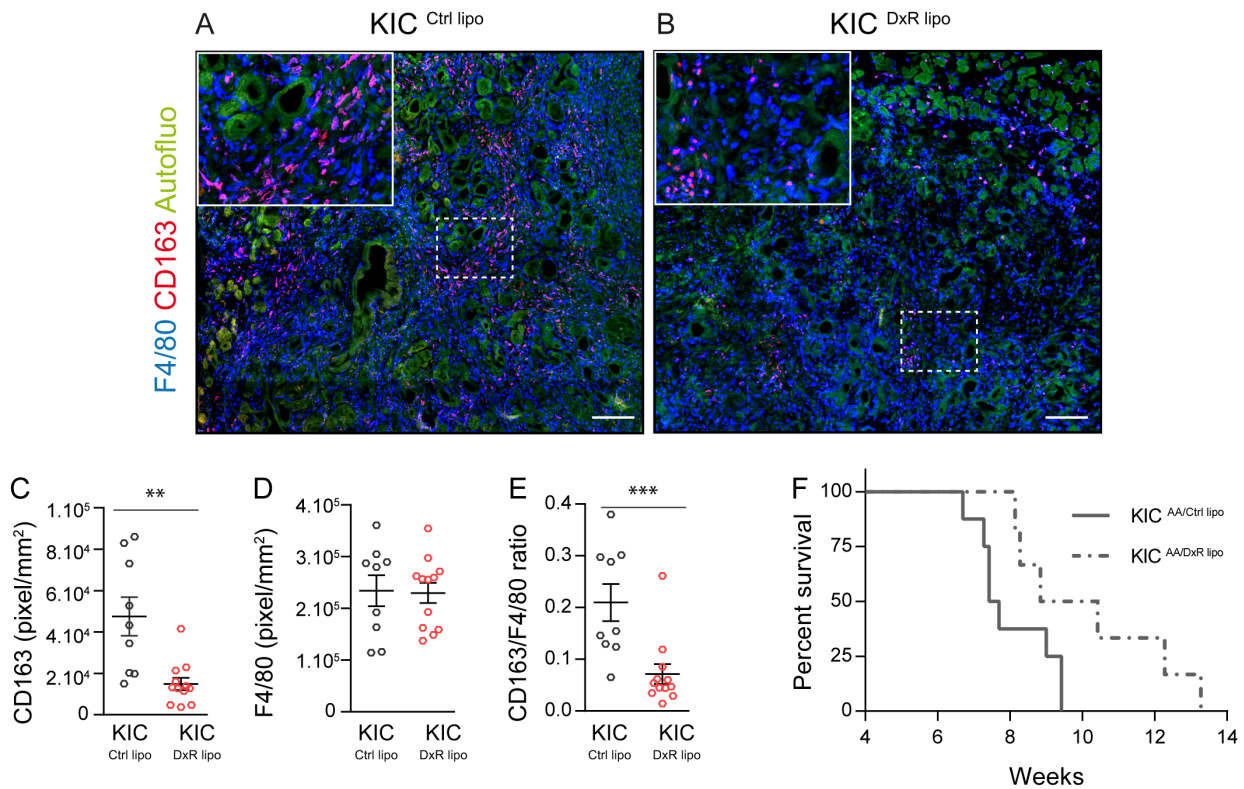

### Supplementary Figure 10. Validation of CD163+ macrophage ablation.

**A** and **B**, Immunolabeling with anti-F4/80 and anti-CD163 antibodies of PDAC sections from 6.5-week-old KIC mice injected twice a week with Ctrl lipo or DxR lipo for 3 weeks. Tissue histology is revealed via autofluorescence. **C–F**, Scattered dot plots depicting the density of CD163+ macrophages (**C**;  $p = 0.0013$ , Mann–Whitney test), F4/80+ macrophages (**D**;  $p = 0.9001$ , unpaired  $t$ -test), and CD163/F4/80 ratio (**E**;  $p = 0.0003$ , Mann–Whitney test) in PDAC of 6.5-week-old KIC mice treated for 3 weeks with Ctrl lipo (KIC<sup>Ctrl lipo</sup>,  $n = 2$  mice, 9 images) or DxR lipo (KIC<sup>DxR lipo</sup>,  $n = 3$  mice, 12 images). Data are presented as median  $\pm$  SEM. **F**, Kaplan–Meier curve comparing overall survival of AA-treated KIC mice injected with Ctrl lipo (KIC<sup>AA/Ctrl lipo</sup>,  $n = 8$ , same as in Figure 10L) or DxR lipo (KIC<sup>AA/DxR lipo</sup>,  $n = 8$ ). KIC<sup>AA/Ctrl lipo</sup> vs. KIC<sup>AA/DxR lipo</sup>,  $p = 0.0109$  (Log-rank test) and hazard ratio B/A = 3.665 (A = KIC<sup>AA/Ctrl lipo</sup> and B = KIC<sup>AA/DxR lipo</sup>). Scale bars = 200  $\mu$ m. Source data are provided as a Source Data file.

**Supplementary Table 1: Definition of parameters describing axonal morphology and relationships with blood vessels**

| Parameters            | Algorithm                                                                                                        | Units                      |
|-----------------------|------------------------------------------------------------------------------------------------------------------|----------------------------|
| Axon density          | $\frac{\text{Dendrite length (sum)} \times 1000}{\text{Volume of the ROI} - \sum \text{Volume of the cavities}}$ | nm / $\mu\text{m}^3$       |
| Branching             | $\frac{\text{Filament No. Dendrite Branch Pts} \times 1000}{\text{Dendrite length (Sum)}}$                       | branch points / mm         |
| Branch length         | <i>Dendrite Length (mean)</i>                                                                                    | $\mu\text{m}$              |
| Branch straightness   | <i>Dendrite Straightness (mean)</i>                                                                              | --                         |
| Branching pattern     | <i>Filament No. Sholl Intersections</i>                                                                          | --                         |
| % contacts axon/BV    | <i>% SurfaceArea coverage<br/>(primary surface = surface of filaments)</i>                                       | %                          |
| Contact size          | <i>Disconnected Components area (mean)</i>                                                                       | $\mu\text{m}^2$            |
| Contact fragmentation | $\frac{\text{Number of Disconnected Components}}{\text{Contact surface area}}$                                   | contacts / $\mu\text{m}^2$ |
| Contact density       | $\frac{\text{Number of Disconnected Components}}{\text{Volume of the ROI} - \sum \text{Volume of the cavities}}$ | contacts / $\mu\text{m}^3$ |
| BV density            | $\frac{\text{Volume of the BV}}{\text{Volume of the ROI} - \sum \text{Volume of the cavities}}$                  | --                         |
| % contact BV/axon     | <i>% SurfaceArea coverage<br/>(primary surface = vascular surface)</i>                                           | %                          |
| Contact/Volume BV     | $\frac{\text{Number of Disconnected Components}}{\text{Volume of the BVs}}$                                      | contacts / $\mu\text{m}^3$ |

**Supplementary Table 2: Referential list of antibodies used for immunohistochemistry**

| Antibody name                                                           | Host animal | Dilution | Source                    | Identifier                        |
|-------------------------------------------------------------------------|-------------|----------|---------------------------|-----------------------------------|
| <b>Primary antibodies</b>                                               |             |          |                           |                                   |
| Anti-Tyrosine Hydroxylase (TH) antibody                                 | rabbit      | 1:200    | Abcam                     | Cat # ab76442, RRID: AB_1524535   |
| Anti-Tyrosine Hydroxylase (TH) antibody                                 | chicken     | 1:200    | Aves Labs                 | Cat # TYH, RRID: AB_10013440      |
| Anti-Tyrosine Hydroxylase (TH) antibody                                 | rabbit      | 1:200    | Merck                     | Cat# AB152, RRID: AB_390204       |
| Anti-Vesicular Acetylcholine Transporter (VACHT) antibody               | rabbit      | 1:250    | Synaptic Systems          | Cat # 139 103, RRID:AB_887864     |
| Anti- CD31 Platelet Endothelial Cell Adhesion Molecule (PECAM) antibody | rat         | 1:400    | BD BioScience             | Cat # 553370, RRID: AB_394816     |
| Anti-Synaptophysin 1 antibody                                           | guinea pig  | 1:400    | Synaptic Systems          | Cat #101 004, RRID: AB_1210382    |
| Anti-F4/80 antibody                                                     | rat         | 1:50     | Santa Cruz Biotechnology  | Cat # sc-71088, RRID: AB_1122714  |
| Anti-CD163 antibody                                                     | rabbit      | 1:1000   | non-commercial            | (1)                               |
| Anti-CD163 (M-96) antibody                                              | rabbit      | 1:100    | Santa Cruz Biotechnology  | Cat # sc-33560, RRID : AB_2074556 |
| Anti-CD45 antibody                                                      | rat         | 1:1000   | Thermo Fisher Scientific  | Cat # 13-0451-82, RRID: AB_466446 |
| Anti-Ki-67 antibody                                                     | mouse       | 1:400    | BD Biosciences            | Cat # 550609, RRID: AB_393778     |
| Anti-Actin smooth muscle (□-SMA) antibody                               | rabbit      | 1:300    | Abcam                     | Cat # ab5694, RRID: AB_2223021    |
| Anti-Actin smooth muscle (□-SMA) antibody                               | goat        | 1:1500   | Novus                     | Cat# NB300-978, RRID: AB_2273630  |
| Anti-Mouse cytokeratin 19 (CK-19) antibody                              | rat         | 1:40     | DSHB                      | Cat # TROMA-III, RRID: AB_2133570 |
| Anti-Panendothelial Cell Antigen Monoclonal Antibody, Clone MECA-32     | rat         | 1:10     | BD Biosciences            | Cat # 550563, RRID: AB_393754     |
| Anti-Insulin antibody                                                   | rabbit      | 1:200    | Cell Signaling Technology | Cat # 4590, RRID : AB_659820      |
| Anti-Insulin antibody                                                   | guinea pig  | 1:2      | Agilent                   | Cat# IR002, RRID: AB_2800361      |
| Anti-Doublecortin (DCX) antibody                                        | rabbit      | 1:500    | Abcam                     | Cat # ab18723, RRID: AB_732011    |
| Anti-Sox10 antibody                                                     | rabbit      | 1:800    | Abcam                     | Cat # ab155279, RRID : AB_2650603 |
| Anti-Vimentin antibody, Clone Vim-13.2                                  | mouse       | 1:200    | Sigma-Aldrich             | Cat# V5255, RRID : AB_477625      |
| <b>Secondary antibodies</b>                                             |             |          |                           |                                   |
| Alexa Fluor 568-conjugated anti-Chicken IgY (H+L) antibody              | goat        | 1:500    | Thermo Fisher Scientific  | Cat# A-11041, RRID: AB_2534098    |

|                                                                                                                            |        |       |                              |                                    |
|----------------------------------------------------------------------------------------------------------------------------|--------|-------|------------------------------|------------------------------------|
| Cy3- conjugated anti-Guinea Pig IgG (H+L) antibody                                                                         | donkey | 1:500 | Jackson Immuno Research Labs | Cat# 706-165-148, RRID: AB_2340460 |
| Alexa Fluor 488-AffiniPure Donkey Anti-Guinea Pig IgG (H+L) (min X Bov,Ck,Gt,Sy Hms,Hrs,Hu,Ms,Rb,Rat,Shp Sr Prot) antibody | donkey | 1:500 | Jackson Immuno Research Labs | Cat# 706-545-148, RRID: AB_2340472 |
| Alexa Fluor 488-conjugated anti-Rabbit IgG (H+L) antibody                                                                  | donkey | 1:500 | Thermo Fisher Scientific     | Cat# A-21206, RRID: AB_2535792     |
| Cy3-conjugated anti-Rabbit IgG (H+L) antibody                                                                              | donkey | 1:500 | Jackson Immuno Research Labs | Cat# 711-165-152, RRID: AB_2307443 |
| Alexa Fluor 568-conjugated anti-Rabbit IgG (H+L) antibody                                                                  | donkey | 1:500 | Thermo Fisher Scientific     | Cat#A10042, RRID: AB_2534017       |
| Alexa Fluor 647- conjugated anti-Rabbit IgG (H+L) antibody                                                                 | donkey | 1:500 | Thermo Fisher Scientific     | Cat# A-31573, RRID: AB_2536183     |
| Alexa Fluor 790-conjugated anti-Rabbit IgG (H+L) antibody                                                                  | donkey | 1:500 | Jackson Immuno Research Labs | Cat# 711-655-152, RRID: AB_2340628 |
| Alexa Fluor 647-conjugated anti-Rat IgG (H+L) antibody                                                                     | donkey | 1:500 | Jackson Immuno Research Labs | Cat#712-605-153, RRID: AB_2340694  |
| Alexa Fluor 790-conjugated anti-Rat IgG (H+L) antibody                                                                     | donkey | 1:500 | Jackson Immuno Research Labs | Cat# 712-655-153, RRID: AB_2340701 |
| Cy3-conjugated anti-Rat IgG (H+L) antibody                                                                                 | donkey | 1:500 | Jackson Immuno Research Labs | Cat# 712-165-153, RRID: AB_2340667 |
| Alexa Fluor 647-conjugated anti-Goat IgG (H+L) antibody                                                                    | donkey | 1:500 | Thermo Fisher Scientific     | Cat# A-21447, RRID: AB_2535864     |
| Alexa Fluor 488-conjugated anti-Mouse IgM mu chain antibody                                                                | donkey | 1:500 | Abcam                        | Cat# ab150121, RRID: AB_2801490    |

### Supplementary reference

1. Etzerodt A, Moestrup SK. CD163 and inflammation: Biological, diagnostic, and therapeutic aspects. *Antioxidants Redox Signal*. 2013. page 2352–63.
