# Supplementary material for: Sympathetic axonal sprouting induces changes in macrophage populations and protects against pancreatic cancer
Source: PubMed Central journal article supplement (PMC9007988; doi:10.1038/s41467-022-29659-w), 2022-04-13
Supplement: 41467_2022_29659_MOESM3_ESM.pdf [file 41467_2022_29659_MOESM3_ESM.pdf]

**Title:** Supplementary Movie 1 :

**Description:** 3D visualization of a whole pancreas from an 8-week-old control mouse immunostained with an anti-TH antibody to reveal sympathetic innervation.

**Title:** Supplementary Movie 2 :

**Description:** 3D visualization of a whole pancreas from an 8-week-old KIC mouse immunostained with an anti-TH antibody to reveal sympathetic innervation.

**Title:** Supplementary Data 1 :

**Description:** Data analysis of axon morphology and interactions with blood vessels in KIC and KPC pancreata

**Title:** Supplementary Data 2 :

**Description:** DSP counts and data analysis
